# Supplementary material
Source: PubMed Central journal article supplement (PMC4292483)
Supplement: AEM.02985-14_zam999105968so1.pdf [file AEM.02985-14_zam999105968so1.pdf]

**Table S1: Abundant proteins expressed by *S. enterica* 14028S at 24 h during growth in germinating alfalfa exudate**

| Protein name                                        | GenBank accession | Gene name   |
|-----------------------------------------------------|-------------------|-------------|
| <b>METABOLIC</b>                                    |                   |             |
| <b>Carbon</b>                                       |                   |             |
| <b>Glycolysis/gluconeogenesis</b>                   |                   |             |
| pyruvate dehydrogenase subunit E1                   | ACY86719.1        | <i>aceE</i> |
| dihydrolipoamide dehydrogenase                      | ACY86721.1        | <i>lpdA</i> |
| glucose-1-phosphatase/inositol phosphatase          | ACY87762.1        | <i>agp</i>  |
| phosphopyruvate hydratase                           | ACY89970.1        | <i>eno</i>  |
| fructose-bisphosphate aldolase                      | ACY90115.1        | <i>fba</i>  |
| fructose-bisphosphate aldolase                      | ACY89085.1        | <i>fbaB</i> |
| glyceraldehyde-3-phosphate dehydrogenase            | ACY88044.1        | <i>gapA</i> |
| phosphoglyceromutase                                | ACY87394.1        | <i>gpmA</i> |
| glycogen synthase                                   | ACY90644.1        | <i>glgA</i> |
| glucose-1-phosphate adenylyltransferase             | ACY90645.1        | <i>glgC</i> |
| phosphoenolpyruvate carboxykinase                   | ACY90605.1        | <i>pckA</i> |
| 6-phosphofructokinase 2                             | ACY88089.1        | <i>pfkB</i> |
| phosphoglycerate kinase                             | ACY90116.1        | <i>pgk</i>  |
| pyruvate kinase                                     | ACY88754.1        | <i>pykA</i> |
| pyruvate kinase                                     | ACY88150.1        | <i>pykF</i> |
| triosephosphate isomerase                           | ACY91263.1        | <i>tpiA</i> |
| <b>Pyruvate metabolism</b>                          |                   |             |
| acetate kinase                                      | ACY89321.1        | <i>ackA</i> |
| acetyl-CoA synthetase                               | ACY91480.1        | <i>acs</i>  |
| bifunctional acetaldehyde-CoA/alcohol dehydrogenase | ACY88579.1        | <i>adhE</i> |
| alcohol dehydrogenase                               | ACY88362.1        | <i>adhP</i> |
| pyruvate formate lyase                              | ACY87593.1        | <i>pfIB</i> |
| phosphate acetyltransferase                         | ACY89322.1        | <i>pta</i>  |
| <b>Pentose phosphate pathway</b>                    |                   |             |
| 6-phosphogluconate dehydrogenase                    | ACY89020.1        | <i>gnd</i>  |
| ribose-5-phosphate isomerase A                      | ACY90108.1        | <i>rpiA</i> |
| transaldolase A                                     | ACY89465.1        | <i>talA</i> |
| transaldolase B                                     | ACY86544.1        | <i>talB</i> |
| transketolase                                       | ACY90124.1        | <i>tktA</i> |
| transketolase                                       | ACY89466.1        | <i>tktB</i> |
| 6-phosphogluconolactonase                           | ACY87409.1        | <i>ybhE</i> |
| <b>Tricarboxylic acid cycle/glyoxylate shunt</b>    |                   |             |
| isocitrate lyase                                    | ACY91371.1        | <i>aceA</i> |
| aconitate hydratase                                 | ACY88538.1        | <i>acnA</i> |

|                                                                   |            |             |
|-------------------------------------------------------------------|------------|-------------|
| bifunctional aconitate hydratase 2/2-methylisocitrate dehydratase | ACY86725.1 | <i>acnB</i> |
| fumarase A                                                        | ACY88244.1 | <i>fumA</i> |
| citrate synthase                                                  | ACY87353.1 | <i>gltA</i> |
| isocitrate dehydrogenase                                          | ACY87902.1 | <i>icdA</i> |
| malate dehydrogenase                                              | ACY90448.1 | <i>mdh</i>  |
| alpha-ketoglutarate decarboxylase                                 | ACY87359.1 | <i>sucA</i> |
| dihydrolipoamide acetyltransferase                                | ACY87360.1 | <i>sucB</i> |
| succinyl-CoA synthetase subunit beta                              | ACY87361.1 | <i>sucC</i> |

### Alternate carbon metabolism

|                                           |            |                   |
|-------------------------------------------|------------|-------------------|
| aldehyde dehydrogenase B                  | ACY90822.1 | <i>aldB</i>       |
| phosphopentomutase                        | ACY91817.1 | <i>deoB</i>       |
| deoxyribose-phosphate aldolase            | ACY91815.1 | <i>deoC</i>       |
| 2,5-diketo-D-gluconate reductase A        | ACY90235.1 | <i>dkgA</i>       |
| UDP-galactose-4-epimerase                 | ACY87399.1 | <i>galE</i>       |
| galactokinase                             | ACY87397.1 | <i>galK</i>       |
| aldose 1-epimerase                        | ACY87396.1 | <i>galM</i>       |
| galactose-1-phosphate uridylyltransferase | ACY87398.1 | <i>galT</i>       |
| alpha-galactosidase                       | ACY91510.1 | <i>meIA</i>       |
| glucosamine-6-phosphate deaminase         | ACY87300.1 | <i>nagB</i>       |
| phosphoglucomutase                        | ACY87319.1 | <i>pgm</i>        |
| 2-methylisocitrate lyase                  | ACY86951.1 | <i>prpB</i>       |
| 2-methylisocitrate dehydratase            | ACY86953.1 | <i>prpD</i>       |
| putative D-mannonate oxidoreductase       | ACY90199.1 | <i>STM14_3796</i> |
| putative dehydrogenase                    | ACY91652.1 | <i>STM14_5317</i> |
| trehalase                                 | ACY88635.1 | <i>treA</i>       |

### Energy

|                                                         |            |             |
|---------------------------------------------------------|------------|-------------|
| F0F1 ATP synthase subunit epsilon                       | ACY91036.1 | <i>atpC</i> |
| F0F1 ATP synthase subunit beta                          | ACY91037.1 | <i>atpD</i> |
| F0F1 ATP synthase subunit gamma                         | ACY91038.1 | <i>atpG</i> |
| F0F1 ATP synthase subunit alpha                         | ACY91039.1 | <i>atpA</i> |
| F0F1 ATP synthase subunit delta                         | ACY91040.1 | <i>atpH</i> |
| bifunctional NADH:ubiquinone oxidoreductase subunit C/D | ACY89306.1 | <i>nuoC</i> |
| succinate dehydrogenase flavoprotein subunit            | ACY87357.1 | <i>sdhA</i> |

### Amino acid

|                                                                |            |             |
|----------------------------------------------------------------|------------|-------------|
| argininosuccinate synthase                                     | ACY90371.1 | <i>argG</i> |
| L-asparaginase II                                              | ACY90156.1 | <i>ansB</i> |
| phospho-2-dehydro-3-deoxyheptonate aldolase                    | ACY87383.1 | <i>aroG</i> |
| aromatic amino acid aminotransferase                           | ACY87622.1 | <i>aspC</i> |
| cysteine synthase A                                            | ACY89417.1 | <i>cysK</i> |
| 2,3,4,5-tetrahydropyridine-2-carboxylate N-succinyltransferase | ACY86787.1 | <i>dapD</i> |

|                                                                               |            |             |
|-------------------------------------------------------------------------------|------------|-------------|
| succinate-semialdehyde dehydrogenase I                                        | ACY89786.1 | <i>gabD</i> |
| glycine cleavage system protein H                                             | ACY90095.1 | <i>gcvH</i> |
| glutamate dehydrogenase                                                       | ACY88056.1 | <i>gdhA</i> |
| glutamine synthetase                                                          | ACY91177.1 | <i>glnA</i> |
| serine hydroxymethyltransferase                                               | ACY89564.1 | <i>glyA</i> |
| ketol-acid reductoisomerase                                                   | ACY91075.1 | <i>ilvC</i> |
| dihydroxy-acid dehydratase                                                    | ACY91070.1 | <i>ilvD</i> |
| branched-chain amino acid aminotransferase                                    | ACY91069.1 | <i>ilvE</i> |
| isopropylmalate isomerase large subunit                                       | ACY86669.1 | <i>leuC</i> |
| S-ribosylhomocysteinase                                                       | ACY89821.1 | <i>luxS</i> |
| 5-methyltetrahydropteroyltriglutamate—<br>homocysteine methyltransferase      | ACY91132.1 | <i>metE</i> |
| methionine sulfoxide reductase A                                              | ACY91629.1 | <i>msrA</i> |
| D-3-phosphoglycerate dehydrogenase                                            | ACY90106.1 | <i>serA</i> |
| phosphoserine aminotransferase                                                | ACY87599.1 | <i>serC</i> |
| agmatinase                                                                    | ACY90127.1 | <i>speB</i> |
| threonine synthase                                                            | ACY86541.1 | <i>thrC</i> |
| <b>tRNA</b>                                                                   |            |             |
| glutamyl-tRNA synthetase                                                      | ACY87303.1 | <i>glnS</i> |
| lysyl-tRNA synthetase                                                         | ACY90079.1 | <i>lysS</i> |
| prolyl-tRNA synthetase                                                        | ACY86817.1 | <i>proS</i> |
| seryl-tRNA synthetase                                                         | ACY87582.1 | <i>serS</i> |
| tyrosyl-tRNA synthetase                                                       | ACY88223.1 | <i>tyrS</i> |
| <b>Nucleotide</b>                                                             |            |             |
| adenylate kinase                                                              | ACY87091.1 | <i>adk</i>  |
| bifunctional 2',3'-cyclic nucleotide 2'-phosphodiesterase/<br>3'-nucleotidase | ACY91622.1 | <i>cpdB</i> |
| inositol-5-monophosphate dehydrogenase                                        | ACY89508.1 | <i>guaB</i> |
| nucleoside diphosphate kinase                                                 | ACY89529.1 | <i>ndk</i>  |
| adenylosuccinate synthetase                                                   | ACY91583.1 | <i>purA</i> |
| uridine phosphorylase                                                         | ACY91137.1 | <i>udp</i>  |
| <b>Cofactors</b>                                                              |            |             |
| putative uroporphyrinogen III C-methyltransferase                             | ACY91099.1 | <i>hemX</i> |
| cysteine desulfurase                                                          | ACY89549.1 | <i>nifS</i> |
| riboflavin synthase subunit beta                                              | ACY87013.1 | <i>ribH</i> |
| <b>Fatty acid/lipid</b>                                                       |            |             |
| 3-ketoacyl-CoA thiolase                                                       | ACY91151.1 | <i>fadA</i> |
| 3-oxoacyl-(acyl carrier protein) synthase I                                   | ACY89366.1 | <i>fabB</i> |
| 3-ketoacyl-(acyl-carrier-protein) reductase                                   | ACY87855.1 | <i>fabG</i> |
| 4-hydroxy-3-methylbut-2-en-1-yl diphosphate synthase                          | ACY89525.1 | <i>ispG</i> |

## Transport

|                                                              |            |             |
|--------------------------------------------------------------|------------|-------------|
| lysine/arginine/ornithine transport protein                  | ACY89340.1 | <i>argT</i> |
| arginine transport system                                    | ACY87537.1 | <i>artI</i> |
| cystine transporter subunit                                  | ACY88825.1 | <i>fliY</i> |
| glutamine ABC transporter periplasmic protein                | ACY87461.1 | <i>glnH</i> |
| glutamate and aspartate transporter subunit                  | ACY87284.1 | <i>gltI</i> |
| histidine transport protein                                  | ACY89339.1 | <i>hisJ</i> |
| high-affinity branched-chain amino acid transporter          | ACY90682.1 | <i>livJ</i> |
| dipeptide transport protein                                  | ACY90762.1 | <i>dppA</i> |
| vitamin B12/cobalamin outer membrane transporter             | ACY91321.1 | <i>btuB</i> |
| glucose-specific PTS system component                        | ACY89423.1 | <i>crr</i>  |
| bifunctional fructose-specific PTS IIA/HPr protein           | ACY89166.1 | <i>fruF</i> |
| maltoporin                                                   | ACY91426.1 | <i>lamB</i> |
| maltose ABC transporter periplasmic protein                  | ACY91424.1 | <i>malE</i> |
| mannose-specific enzyme IIAB                                 | ACY88675.1 | <i>manX</i> |
| galactose transport protein                                  | ACY89141.1 | <i>mgIB</i> |
| outer membrane porin protein C                               | ACY89238.1 | <i>ompC</i> |
| outer membrane protein F                                     | ACY87624.1 | <i>ompF</i> |
| PTS system phosphohistidinoprotein-hexose phosphotransferase | ACY89421.1 | <i>ptsH</i> |
| phosphoenolpyruvate-protein phosphotransferase               | ACY89422.1 | <i>ptsI</i> |
| D-ribose transporter subunit                                 | ACY91057.1 | <i>rbsB</i> |
| tricarboxylic transport                                      | ACY89780.1 | STM14_3361  |
| glycerol-3-phosphate transporter periplasmic binding protein | ACY90671.1 | <i>ugpB</i> |
| nucleoside channel                                           | ACY87008.1 | <i>tsx</i>  |
| long-chain fatty acid outer membrane transporter             | ACY89381.1 | <i>fadL</i> |
| thiosulfate transporter subunit                              | ACY89434.1 | <i>cysP</i> |
| phosphate transporter subunit                                | ACY91028.1 | <i>pstS</i> |
| outer membrane channel protein                               | ACY90262.1 | <i>tolC</i> |
| ferrichrome outer membrane transporter                       | ACY86763.1 | <i>fhuA</i> |
| putative transport protein                                   | ACY89112.1 | <i>yehZ</i> |

## Cell envelope

|                                                                |            |             |
|----------------------------------------------------------------|------------|-------------|
| acetyl-CoA carboxylase carboxyltransferase subunit alpha       | ACY86808.1 | <i>accA</i> |
| acetyl-CoA carboxylase biotin carboxyl carrier protein subunit | ACY90472.1 | <i>accB</i> |
| acetyl-CoA carboxylase biotin carboxylase subunit              | ACY90473.1 | <i>accC</i> |
| UTP--glucose-1-phosphate uridylyltransferase subunit GalF      | ACY89037.1 | <i>galF</i> |
| UTP--glucose-1-phosphate uridylyltransferase subunit GalU      | ACY88584.1 | <i>galU</i> |
| 2-dehydro-3-deoxyphosphooctonate aldolase                      | ACY88605.1 | <i>kdsA</i> |
| murein lipoprotein                                             | ACY88149.1 | <i>lpp</i>  |
| periplasmic murein tripeptide transport protein                | ACY88495.1 | <i>mppA</i> |
| UDP-N-acetylglucosamine 1-carboxyvinyltransferase              | ACY90390.1 | <i>murA</i> |
| oligopeptide transport protein                                 | ACY88576.1 | <i>oppA</i> |

|                                                                                  |            |             |
|----------------------------------------------------------------------------------|------------|-------------|
| aminoacyl-histidine dipeptidase                                                  | ACY86894.1 | <i>pepD</i> |
| ADP-L-glycero-D-mannoheptose-6-epimerase                                         | ACY90855.1 | <i>rfaD</i> |
| bifunctional heptose 7-phosphate kinase/heptose 1-phosphate<br>adenyltransferase | ACY90279.1 | <i>rfaE</i> |
| CDP-6-deoxy-D-xylo-4-hexulose-3-dehydrase                                        | ACY89029.1 | <i>rfbH</i> |

### **Oxidative stress response**

|                                              |            |                   |
|----------------------------------------------|------------|-------------------|
| glutathione peroxidase                       | ACY88107.1 | <i>btuE</i>       |
| gamma-glutamyltranspeptidase                 | ACY90664.1 | <i>ggt</i>        |
| glutathione reductase                        | ACY90715.1 | <i>gor</i>        |
| glutaredoxin 2                               | ACY87822.1 | <i>grxB</i>       |
| glutaredoxin 3                               | ACY91028.1 | <i>grxC</i>       |
| hypothetical protein                         | ACY88207.1 | <i>ydhD</i>       |
| putative catalase                            | ACY88561.1 | <i>STM14_2094</i> |
| superoxide dismutase                         | ACY88214.1 | <i>sodC</i>       |
| alkyl hydroperoxide reductase subunit C      | ACY87219.1 | <i>ahpC</i>       |
| hydroperoxidase II                           | ACY88079.1 | <i>katE</i>       |
| putative thiol-alkyl hydroperoxide reductase | ACY86996.1 | <i>STM14_0476</i> |
| thioredoxin                                  | ACY91082.1 | <i>trxA</i>       |
| thioredoxin reductase                        | ACY87574.1 | <i>trxB</i>       |

### **Other**

|                           |            |            |
|---------------------------|------------|------------|
| inorganic pyrophosphatase | ACY91636.1 | <i>ppa</i> |
|---------------------------|------------|------------|

## **NON-METABOLIC**

### **“Unknown metabolic”, no associated reaction**

#### **Amino acid**

|                                              |            |                   |
|----------------------------------------------|------------|-------------------|
| putative glutamic dehydrogenase-like protein | ACY88633.1 | <i>STM14_2170</i> |
|----------------------------------------------|------------|-------------------|

#### **Sugar**

|                                                 |            |                   |
|-------------------------------------------------|------------|-------------------|
| maltose regulon periplasmic protein             | ACY91428.1 | <i>malM</i>       |
| putative glycosyl hydrolase                     | ACY88352.1 | <i>STM14_1881</i> |
| putative glycosyl hydrolase                     | ACY88353.1 | <i>STM14_1882</i> |
| putative nucleoside-diphosphate-sugar epimerase | ACY89929.1 | <i>STM14_3516</i> |
| putative oxidoreductase                         | ACY87018.1 | <i>yajO</i>       |

#### **Iron**

|                                                           |            |             |
|-----------------------------------------------------------|------------|-------------|
| bacterioferritin, iron storage and detoxification protein | ACY90537.1 | <i>bfr</i>  |
| ferric uptake regulator                                   | ACY87312.1 | <i>fur</i>  |
| putative ferripyochelin-binding protein                   | ACY90493.1 | <i>yrdA</i> |

**Transport**

putrescine ABC transporter periplasmic substrate-binding protein ACY87523.1 *potF*

**Genetic information processing****DNA replication**

DNA gyrase subunit B ACY91005.1 *gyrB*

single-strand DNA-binding protein ACY91453.1 *ssb*

**Homologous recombination**

Recombinase A ACY89831.1 *recA*

**Transcription**

transcription elongation factor GreA ACY90381.1 *greA*

transcriptional regulator HU subunit alpha ACY91356.1 *hupA*

transcription elongation factor NusA ACY90369.1 *nusA*

DNA-binding transcriptional activator OsmE ACY88071.1 *osmE*

transcription termination factor Rho ACY91083.1 *rho*

nucleoside diphosphate kinase regulator ACY87229.1 *rnk*

DNA-directed RNA polymerase subunit alpha ACY90509.1 *rpoA*

DNA-directed RNA polymerase subunit beta ACY91336.1 *rpoB*

DNA-directed RNA polymerase subunit beta' ACY91337.1 *rpoC*

TrpR binding protein WrbA ACY87764.1 *wrbA*

**RNA degradation**

polynucleotide phosphorylase/polyadenylase ACY90363.1 *pnp*

ribonuclease E ACY87845.1 *rne*

**Translation**

translation initiation factor IF-3 ACY88099.1 *infC*

putative translation initiation inhibitor ACY91684.1 *yjhF*

elongation factor G ACY90541.1 *fusA*

elongation factor P ACY89175.1 *yeiP*

elongation factor Ts ACY86792.1 *tsf*

elongation factor Tu ACY90540.1 *tuf*

ribosome recycling factor ACY86794.1 *frr*

translation-associated GTPase ACY88620.1 *ychF*

**Ribosomal**

50S ribosomal protein L1 ACY91333.1 *rplA*

50S ribosomal protein L2 ACY90531.1 *rplB*

50S ribosomal protein L3 ACY90534.1 *rplC*

50S ribosomal protein L4 ACY90533.1 *rplD*

|                           |            |             |
|---------------------------|------------|-------------|
| 50S ribosomal protein L5  | ACY90522.1 | <i>rplE</i> |
| 50S ribosomal protein L6  | ACY90519.1 | <i>rplF</i> |
| 50S ribosomal protein L9  | ACY91613.1 | <i>rplI</i> |
| 50S ribosomal protein L10 | ACY91334.1 | <i>rplJ</i> |
| 50S ribosomal protein L11 | ACY91332.1 | <i>rplK</i> |
| 50S ribosomal protein L13 | ACY90433.1 | <i>rplM</i> |
| 50S ribosomal protein L14 | ACY90524.1 | <i>rplN</i> |
| 50S ribosomal protein L15 | ACY90515.1 | <i>rplO</i> |
| 50S ribosomal protein L17 | ACY90508.1 | <i>rplQ</i> |
| 50S ribosomal protein L18 | ACY90518.1 | <i>rplR</i> |
| 50S ribosomal protein L19 | ACY89700.1 | <i>rplS</i> |
| 30S ribosomal protein S1  | ACY87604.1 | <i>rpsA</i> |
| 30S ribosomal protein S2  | ACY86791.1 | <i>rpsB</i> |
| 30S ribosomal protein S3  | ACY90528.1 | <i>rpsC</i> |
| 30S ribosomal protein S4  | ACY90510.1 | <i>rpsD</i> |
| 30S ribosomal protein S5  | ACY90517.1 | <i>rpsE</i> |
| 30S ribosomal protein S6  | ACY91610.1 | <i>rpsF</i> |
| 30S ribosomal protein S7  | ACY90542.1 | <i>rpsG</i> |
| 30S ribosomal protein S10 | ACY90535.1 | <i>rpsJ</i> |
| 30S ribosomal protein S11 | ACY90511.1 | <i>rpsK</i> |
| 30S ribosomal protein S13 | ACY90512.1 | <i>rpsM</i> |

#### **tRNA**

|                        |            |             |
|------------------------|------------|-------------|
| putative tRNA synthase | ACY89932.1 | <i>ygbK</i> |
|------------------------|------------|-------------|

#### **Post-translational processing**

|                           |            |            |
|---------------------------|------------|------------|
| methionine aminopeptidase | ACY86789.1 | <i>map</i> |
| trigger factor            | ACY87047.1 | <i>tig</i> |

#### **Proteases**

|                                 |            |             |
|---------------------------------|------------|-------------|
| serine endoprotease             | ACY90436.1 | <i>degQ</i> |
| oligopeptidase A                | ACY90711.1 | <i>priC</i> |
| putative Zn-dependent peptidase | ACY90737.1 | <i>yhjJ</i> |

### **Environmental information processing**

#### **Biofilm formation**

|                                                 |            |             |
|-------------------------------------------------|------------|-------------|
| cellulose synthase subunit BcsC                 | ACY90743.1 | <i>bcsC</i> |
| putative curli operon transcriptional regulator | ACY87791.1 | <i>csgG</i> |

#### **Osmotic homeostasis**

|                           |            |             |
|---------------------------|------------|-------------|
| molecular chaperone DnaK  | ACY86550.1 | <i>dnaK</i> |
| putative envelope protein | ACY88357.1 | <i>osmC</i> |

**Quorum sensing**

|                                        |            |             |
|----------------------------------------|------------|-------------|
| putative sugar transport protein       | ACY91259.1 | <i>IsrB</i> |
| aldolase                               | ACY91260.1 | <i>IsrF</i> |
| autoinducer-2 (AI-2) modifying protein | ACY91261.1 | <i>IsrG</i> |

**Signal transduction**

|                                  |            |             |
|----------------------------------|------------|-------------|
| two-component response regulator | ACY91847.1 | <i>arcA</i> |
|----------------------------------|------------|-------------|

**Stress response**

|                                                        |            |                   |
|--------------------------------------------------------|------------|-------------------|
| ATP-dependent Clp protease proteolytic subunit         | ACY87048.1 | <i>clpP</i>       |
| chaperonin GroEL                                       | ACY91545.1 | <i>groEL</i>      |
| co-chaperonin GroES                                    | ACY91544.1 | <i>groES</i>      |
| ATP-dependent protease ATP-binding subunit             | ACY91276.1 | <i>hslU</i>       |
| serine endoprotease                                    | ACY86784.1 | <i>htrA</i>       |
| periplasmic chaperone                                  | ACY86801.1 | <i>skp</i>        |
| FKBP-type peptidyl-prolyl cis-trans isomerase          | ACY90550.1 | <i>slyD</i>       |
| peptidyl-prolyl cis-trans isomerase B (rotamase B)     | ACY87143.1 | <i>STM14_0626</i> |
| peptidyl-prolyl cis-trans isomerase SurA               | ACY86648.1 | <i>surA</i>       |
| thioredoxin-dependent thiol peroxidase                 | ACY89486.1 | <i>bcp</i>        |
| DNA starvation/stationary phase protection protein Dps | ACY87463.1 | <i>dps</i>        |
| organic solvent tolerance protein                      | ACY86649.1 | <i>imp</i>        |
| thiol peroxidase                                       | ACY88498.1 | <i>tpx</i>        |
| exonuclease III                                        | ACY88059.1 | <i>xthA</i>       |
| cytochrome d ubiquinol oxidase subunit III             | ACY90435.1 | <i>yhcb</i>       |

**Transport**

|                                              |            |                   |
|----------------------------------------------|------------|-------------------|
| putative outer membrane porin precursor      | ACY88369.1 | <i>nmpC</i>       |
| preprotein translocase subunit SecB          | ACY90845.1 | <i>secB</i>       |
| putative outer membrane efflux protein       | ACY89720.1 | <i>STM14_3298</i> |
| conjugative transfer protein                 | ACY91438.1 | <i>STM14_5099</i> |
| translocation protein TolB                   | ACY87374.1 | <i>tolB</i>       |
| putative DNA uptake protein                  | ACY90618.1 | <i>yhgl</i>       |
| putative ABC transporter ATP-binding protein | ACY91830.1 | <i>yjjK</i>       |

**Cellular processes****Cell cycle/division**

|                              |            |             |
|------------------------------|------------|-------------|
| cold shock-like protein CspC | ACY88683.1 | <i>cspC</i> |
| cell division protein FtsZ   | ACY86696.1 | <i>ftsZ</i> |
| cell division inhibitor MinD | ACY88657.1 | <i>minD</i> |



|                               |            |             |
|-------------------------------|------------|-------------|
| rod shape-determining protein | ACY90464.1 | <i>mreB</i> |
| peptidase PmbA                | ACY91663.1 | <i>pmbA</i> |

### Cell envelope

|                                                     |            |                   |
|-----------------------------------------------------|------------|-------------------|
| outer-membrane lipoprotein carrier protein          | ACY87579.1 | <i>lolA</i>       |
| lipoprotein                                         | ACY89483.1 | <i>nlpB</i>       |
| outer membrane protein A                            | ACY87707.1 | <i>ompA</i>       |
| outer membrane protein X                            | ACY87468.1 | <i>ompX</i>       |
| peptidoglycan-associated outer membrane lipoprotein | ACY87375.1 | <i>pal</i>        |
| carboxy-terminal protease                           | ACY88695.1 | <i>prc</i>        |
| rare lipoprotein A                                  | ACY87258.1 | <i>rlpA</i>       |
| LPS-assembly lipoprotein RplB                       | ACY87267.1 | <i>rlpB</i>       |
| putative outer membrane lipoprotein                 | ACY88219.1 | <i>slyB</i>       |
| putative outer membrane lipoprotein                 | ACY88416.1 | <i>STM14_1945</i> |
| outer membrane protein assembly factor YaeT         | ACY86800.1 | <i>yaeT</i>       |
| putative outer membrane lipoprotein                 | ACY87868.1 | <i>ycfM</i>       |
| putative outer membrane lipoprotein                 | ACY90779.1 | <i>yiaD</i>       |

### Unknown function

#### Cytoplasm

|                                   |            |                   |
|-----------------------------------|------------|-------------------|
| putative cytoplasmic protein      | ACY87716.1 | <i>STM14_1223</i> |
| putative cytoplasmic protein      | ACY88435.1 | <i>STM14_1964</i> |
| putative cytoplasmic protein      | ACY88483.1 | <i>STM14_2012</i> |
| putative cytoplasmic protein      | ACY88702.1 | <i>STM14_2239</i> |
| putative cytoplasmic protein      | ACY88560.1 | <i>yciE</i>       |
| putative cytoplasmic protein      | ACY88559.1 | <i>yciF</i>       |
| putative intracellular proteinase | ACY90350.1 | <i>yhbO</i>       |

#### Periplasm

|                              |            |             |
|------------------------------|------------|-------------|
| periplasmic protein          | ACY91808.1 | <i>ybiS</i> |
| putative periplasmic protein | ACY88242.1 | <i>ydgA</i> |
| putative periplasmic protein | ACY88258.1 | <i>ydgH</i> |

#### Hypothetical proteins

|                      |            |                   |
|----------------------|------------|-------------------|
| hypothetical protein | ACY86786.1 | <i>STM14_0251</i> |
| hypothetical protein | ACY87067.1 | <i>STM14_0549</i> |
| hypothetical protein | ACY89526.1 | <i>STM14_3095</i> |
| hypothetical protein | ACY89790.1 | <i>STM14_3371</i> |
| hypothetical protein | ACY90112.1 | <i>STM14_3705</i> |
| hypothetical protein | ACY90348.1 | <i>STM14_3949</i> |
| hypothetical protein | ACY87474.1 | <i>ybiS</i>       |
| hypothetical protein | ACY90882.1 | <i>yicC</i>       |

## Unassigned

|                                                        |            |                   |
|--------------------------------------------------------|------------|-------------------|
| electron carrier protein                               | ACY89544.1 | <i>fds</i>        |
| global DNA-binding transcriptional dual regulator H-NS | ACY88582.1 | <i>hns</i>        |
| N-ethylmaleimide reductase                             | ACY88210.1 | <i>nemA</i>       |
| quinone oxidoreductase, NADPH-dependent                | ACY91442.1 | <i>qor</i>        |
| putative NAD-dependent aldehyde dehydrogenase          | ACY91761.1 | <i>STM14_5430</i> |
| GTP-binding protein                                    | ACY91179.1 | <i>typA</i>       |
| iron-sulfur cluster insertion protein ErpA             | ACY86779.1 | <i>yadR</i>       |
| nucleotide-binding protein                             | ACY87033.1 | <i>yajQ</i>       |
| putative dehydrogenase                                 | ACY87228.1 | <i>ybdR</i>       |
| purine nucleoside phosphoramidase                      | ACY87866.1 | <i>ycfF</i>       |
| putative serine protein kinase                         | ACY88037.1 | <i>yeaG</i>       |
| putative methyltransferase                             | ACY89674.1 | <i>yfiF</i>       |
| putative lipoprotein                                   | ACY90008.1 | <i>ygdI</i>       |
| oxidoreductase                                         | ACY90226.1 | <i>yghA</i>       |
| putative oxidoreductase                                | ACY91021.1 | <i>yieF</i>       |
| putative NADP-dependent oxidoreductase                 | ACY88395.1 | <i>yncB</i>       |

**Table S2: Amino acid supplementation complements the growth defects of amino acid auxotrophs**

| Mutant                      | Auxotrophy | n | 48h       |                 | 72h       |                 |
|-----------------------------|------------|---|-----------|-----------------|-----------|-----------------|
|                             |            |   | Treatment | Relative growth | Treatment | Relative growth |
| <i>ΔasnA::Kan ΔasnB::Cm</i> | Asn        | 4 | -         | -0.36 ± 0.15    | -         | -0.36 ± 0.05    |
|                             |            |   | +1mM Asn  | -0.28 ± 0.18    | +1mM Asn  | -0.09 ± 0.14    |
| <i>glnA::Cm</i>             | Gln        | 3 | -         | -0.16 ± 0.13    | -         | WT              |
|                             |            |   | +1mM Gly  | +0.24 ± 0.05    | +1mM Gln  | WT              |
| <i>glyA::Tn10</i>           | Gly        | 3 | -         | -0.40 ± 0.10    | -         | -0.36 ± 0.10    |
|                             |            |   | +1mM Gly  | -0.23 ± 0.11    | +1mM Gly  | WT              |
| <i>ΔhisB::Kan</i>           | His        | 3 | -         | WT              | -         | WT              |
|                             |            |   | +1mM His  | WT              | +1mM His  | +0.13 ± 0.02    |
| <i>ΔlysA::Kan</i>           | Lys        | 3 | -         | -0.58 ± 0.04    | -         | -0.54 ± 0.11    |
|                             |            |   | +1mM Lys  | -0.65 ± 0.15    | +1mM Lys  | -0.33 ± 0.13    |
| <i>ΔmetC::Kan</i>           | Met        | 3 | -         | -0.84 ± 0.10    | -         | -0.83 ± 0.18    |
|                             |            |   | +1mM Met  | -0.22 ± 0.04    | +1mM Met  | -0.21 ± 0.01    |
| <i>proC693::MudA</i>        | Pro        | 3 | -         | -0.27 ± 0.07    | -         | WT              |
|                             |            |   | +1mM Pro  | WT              | +1mM Pro  | WT              |
| <i>ΔtrpB::Kan</i>           | Trp        | 3 | -         | -0.63 ± 0.13    | -         | -1.01 ± 0.12    |
|                             |            |   | +1mM Trp  | -0.55 ± 0.17    | +1mM Trp  | -0.34 ± 0.12    |

\* indicates statistically significant differences between treatments (p<0.05).

**Table S3: Amino acid auxotrophs are reduced in fitness in the alfalfa spermosphere/rhizosphere compared to *S. enterica* wild-type**

| Mutant                                 | Auxotrophy    | n | Percent total population of mutant |               |              |
|----------------------------------------|---------------|---|------------------------------------|---------------|--------------|
|                                        |               |   | 24h                                | 48h           | 72h          |
| <i>ΔasnA::Kan ΔasnB::Cm</i>            | Asn           | 4 | 43.3 ± 16.0                        | 19.0 ± 3.4 *  | ND           |
| <i>ΔglnA::Kan</i>                      | Gln           | 4 | 66.4 ± 10.6 *                      | 16.5 ± 5.9 *  | 19.2 ± 8.7 * |
| <i>ΔgdhA::Kan ΔgltB::Cm</i>            | Glu           | 4 | 43.3 ± 23.3                        | 40.7 ± 4.9 *  | ND           |
| <i>glyA::Tn10d</i>                     | Gly           | 3 | 39.2 ± 11.8                        | 17.2 ± 4.8 *  | 18.7 ± 8.9 * |
| <i>ΔhisB::Kan</i>                      | His           | 4 | 52.7 ± 22.5                        | 68.9 ± 9.2 *  | ND           |
| <i>ΔilvE::Cm</i>                       | Ilv, Leu, Val | 3 | 67.6 ± 13.2                        | 43.2 ± 12.6   | ND           |
| <i>ΔleuB::Kan</i>                      | Leu           | 5 | 31.0 ± 10.7 *                      | 11.3 ± 2.1 *  | ND           |
| <i>ΔlysA::Kan</i>                      | Lys           | 3 | 44.8 ± 15.5                        | 20.7 ± 9.0 *  | 15.7 ± 4.4 * |
| <i>ΔmetC::Kan</i>                      | Met           | 4 | 34.6 ± 8.9 *                       | 17.1 ± 6.3 *  | ND           |
| <i>ΔpheA::Kan</i>                      | Phe           | 4 | 33.4 ± 4.9 *                       | 20.5 ± 4.5 *  | ND           |
| <i>pro693C::MudA</i>                   | Pro           | 4 | 32.5 ± 7.7 *                       | 16.3 ± 2.8 *  | 16.4 ± 5.3 * |
| <i>thr557::Tn10</i>                    | Thr           | 4 | 72.4 ± 9.6*                        | 64.4 ± 5.2 *  | 70.3 ± 7.0 * |
| <i>ΔtrpB::Kan</i>                      | Trp           | 5 | 24.2 ± 6.2 *                       | 13.7 ± 2.8 *  | ND           |
| <i>ΔtyrA::Kan</i>                      | Tyr           | 4 | 34.6 ± 4.9 *                       | 29.7 ± 11.6 * | ND           |
| <i>ΔpheASTM2668tyrA::Cm</i>            | Phe, Tyr      | 3 | 32.7 ± 5.8 *                       | 19.8 ± 0.2 *  | 12.9 ± 3.7 * |
| <i>ΔpheASTM2668tyrA::Cm ΔtrpB::Kan</i> | Phe, Trp, Tyr | 3 | 46.6 ± 3.4                         | 13.0 ± 4.6 *  | 11.3 ± 2.5 * |

\* indicates statistically different from 50%

ND = not determined

**Table S4: Concentrations ( $\mu\text{M}$ ) of amino acids and their derivatives released by alfalfa seeds during germination and early plant development**

| Metabolite           | Concentration ( $\mu\text{M}$ ) |                   |                    |                    |                     |
|----------------------|---------------------------------|-------------------|--------------------|--------------------|---------------------|
|                      | 0 h *                           | 8 h               | 24 h               | 48 h               | 72 h                |
| Alanine              | 4.59 $\pm$ 4.84                 | 25.82 $\pm$ 1.55  | 61.27 $\pm$ 0.91   | 86.27 $\pm$ 10.18  | 93.66 $\pm$ 11.90   |
| Arginine             | 0.86 $\pm$ 0.13                 | 44.61 $\pm$ 4.18  | 79.82 $\pm$ 1.96   | 76.20 $\pm$ 9.07   | 23.54 $\pm$ 16.25   |
| Asparagine           | 1.17 $\pm$ 0.13                 | 35.38 $\pm$ 0.26  | 48.73 $\pm$ 0.94   | 80.74 $\pm$ 4.82   | 45.08 $\pm$ 17.36   |
| Aspartate            | 1.07 $\pm$ 0.08                 | 22.45 $\pm$ 1.72  | 47.08 $\pm$ 5.93   | 100.51 $\pm$ 1.30  | 52.96 $\pm$ 12.79   |
| Glutamate            | 0.74 $\pm$ 0.04                 | 30.90 $\pm$ 2.83  | 52.99 $\pm$ 2.59   | 92.04 $\pm$ 12.95  | 66.21 $\pm$ 16.64   |
| Glutamine            | 0.10 $\pm$ 0.00                 | 9.23 $\pm$ 0.04   | 30.70 $\pm$ 2.26   | 46.02 $\pm$ 1.82   | 32.87 $\pm$ 10.60   |
| Glycine              | 6.14 $\pm$ 3.22                 | 3.15 $\pm$ 1.31   | 1.63 $\pm$ 1.19    | 1.86 $\pm$ 1.06    | 2.97 $\pm$ 1.03     |
| Histidine            | 0.34 $\pm$ 0.02                 | 8.40 $\pm$ 0.47   | 19.50 $\pm$ 4.12   | 16.89 $\pm$ 0.07   | 7.80 $\pm$ 3.50     |
| Leucine/Isoleucine   | 2.79 $\pm$ 0.21                 | 18.88 $\pm$ 2.11  | 60.21 $\pm$ 2.24   | 117.41 $\pm$ 16.81 | 54.64 $\pm$ 22.76   |
| Lysine               | 0.20 $\pm$ 0.01                 | 15.15 $\pm$ 1.71  | 62.03 $\pm$ 1.54   | 69.01 $\pm$ 1.40   | 38.46 $\pm$ 27.62   |
| Methionine           | 0.24 $\pm$ 0.05                 | 2.35 $\pm$ 0.11   | 8.97 $\pm$ 0.37    | 7.88 $\pm$ 0.25    | 3.62 $\pm$ 2.33     |
| Phenylalanine        | 0.45 $\pm$ 0.00                 | 13.49 $\pm$ 0.12  | 30.61 $\pm$ 1.27   | 50.93 $\pm$ 0.34   | 24.70 $\pm$ 8.44    |
| Proline              | 3.92 $\pm$ 1.92                 | 11.67 $\pm$ 0.47  | 29.76 $\pm$ 0.15   | 38.38 $\pm$ 0.24   | 24.80 $\pm$ 7.33    |
| Serine               | 0.76 $\pm$ 0.51                 | 14.68 $\pm$ 1.91  | 56.15 $\pm$ 6.84   | 82.45 $\pm$ 4.63   | 53.14 $\pm$ 31.89   |
| Threonine            | 4.73 $\pm$ 0.90                 | 111.55 $\pm$ 9.89 | 212.53 $\pm$ 10.41 | 302.80 $\pm$ 43.81 | 278.17 $\pm$ 117.07 |
| Tryptophan           | 0.02 $\pm$ 0.02                 | 1.88 $\pm$ 0.07   | 4.79 $\pm$ 0.03    | 6.04 $\pm$ 0.24    | 4.77 $\pm$ 1.71     |
| Tyrosine             | 0.48 $\pm$ 0.10                 | 38.39 $\pm$ 6.77  | 61.99 $\pm$ 9.33   | 81.19 $\pm$ 1.33   | 48.32 $\pm$ 18.20   |
| Valine               | 0.42 $\pm$ 0.00                 | 11.06 $\pm$ 0.12  | 30.38 $\pm$ 0.98   | 46.44 $\pm$ 1.10   | 26.38 $\pm$ 6.88    |
| Acetyllysine         | 0.00 $\pm$ 0.00                 | 0.03 $\pm$ 0.01   | 0.06 $\pm$ 0.01    | 0.10 $\pm$ 0.02    | 0.09 $\pm$ 0.02     |
| GABA                 | 0.00 $\pm$ 0.00                 | 23.32 $\pm$ 0.79  | 38.27 $\pm$ 6.91   | 70.35 $\pm$ 2.92   | 28.62 $\pm$ 4.35    |
| Hydroxyproline       | 0.38 $\pm$ 0.02                 | 2.26 $\pm$ 0.20   | 3.22 $\pm$ 0.17    | 3.33 $\pm$ 0.08    | 2.11 $\pm$ 0.022    |
| Methionine sulfoxide | 0.13 $\pm$ 0.09                 | 1.75 $\pm$ 0.15   | 6.10 $\pm$ 1.47    | 9.17 $\pm$ 0.83    | 5.93 $\pm$ 1.94     |
| Ornithine            | 0.51 $\pm$ 0.61                 | 5.88 $\pm$ 0.41   | 17.46 $\pm$ 1.59   | 16.12 $\pm$ 0.07   | 4.14 $\pm$ 4.30     |
| Pyroglutamate        | 0.79 $\pm$ 0.70                 | 10.36 $\pm$ 1.37  | 19.04 $\pm$ 4.23   | 15.88 $\pm$ 0.16   | 6.88 $\pm$ 2.17     |

\* Values at 0h indicate concentrations present immediately after addition of water to seeds and likely indicate unbound amino acids present on the seed surface.

\*\* Cysteine/Cystine could not be reliably detected by our system and was not included in the analysis.

**Table S5: Relative depletion of amino acids and their derivatives in alfalfa seedling exudate in the presence of *S. enterica***

| Metabolite           | Average ratio of nutrient concentration<br>with Se : no Se |               |               |
|----------------------|------------------------------------------------------------|---------------|---------------|
|                      | 24 h                                                       | 48 h          | 72 h          |
| Alanine              | 1.02 ± 0.13                                                | 0.04 ± 0.01 * | 0.04 ± 0.02 * |
| Arginine             | 1.16 ± 0.42                                                | 0.00 ± 0.00 * | 0.00 ± 0.00 * |
| Asparagine           | 0.93 ± 0.19                                                | 0.01 ± 0.00 * | 0.01 ± 0.00 * |
| Aspartate            | 0.65 ± 0.18 †                                              | 0.01 ± 0.00 * | 0.01 ± 0.00 * |
| Glutamate            | 0.87 ± 0.10                                                | 0.00 ± 0.00 * | 0.00 ± 0.00 * |
| Glutamine            | 0.93 ± 0.08                                                | 0.02 ± 0.00 * | 0.02 ± 0.00 * |
| Histidine            | 0.70 ± 0.45                                                | 0.11 ± 0.01 * | 0.08 ± 0.09 * |
| Leucine/isoleucine   | 0.92 ± 0.13                                                | 0.00 ± 0.00 * | 0.00 ± 0.00 * |
| Lysine               | 1.18 ± 0.54                                                | 0.01 ± 0.00 * | 0.03 ± 0.01 * |
| Methionine           | 0.78 ± 0.16                                                | 0.00 ± 0.00 * | 0.00 ± 0.02 * |
| Phenylalanine        | 0.95 ± 0.09                                                | 0.14 ± 0.14 * | 0.19 ± 0.10 * |
| Proline              | 0.87 ± 0.02 †                                              | 0.01 ± 0.00 * | 0.01 ± 0.00 * |
| Serine               | 0.36 ± 0.29 †                                              | 0.02 ± 0.00 * | 0.03 ± 0.01 * |
| Threonine            | 1.06 ± 0.10                                                | 0.07 ± 0.01 * | 0.06 ± 0.02 * |
| Tryptophan           | 0.79 ± 0.09 †                                              | 0.00 ± 0.01 * | 0.03 ± 0.03 * |
| Tyrosine             | 1.07 ± 0.13                                                | 0.29 ± 0.32 † | 0.46 ± 0.23 * |
| Valine               | 0.73 ± 0.22                                                | 0.00 ± 0.00 * | 0.01 ± 0.00 * |
| Acetyllysine         | 0.41 ± 0.32 †                                              | 0.07 ± 0.01 * | 0.11 ± 0.07 * |
| Hydroxyproline       | 1.02 ± 0.05                                                | 1.03 ± 0.10   | 1.06 ± 0.16   |
| Methionine sulfoxide | 0.91 ± 0.08                                                | 0.04 ± 0.01 * | 0.05 ± 0.04 * |
| Ornithine            | 1.29 ± 0.71                                                | 0.02 ± 0.01 * | 0.02 ± 0.01 * |
| Pyroglutamic acid    | 0.96 ± 0.07                                                | 0.84 ± 0.07 * | 1.06 ± 0.53   |

\* indicates p<0.05.

† indicates 0.05<p<0.1.

**Table S6: Comparison of amino acid availability and *S. enterica* requirements for growth at 24 h in germinating alfalfa exudate**

| Metabolite | Concentration ( $\mu\text{M}$ ) |                        | Ratio<br>required:available |
|------------|---------------------------------|------------------------|-----------------------------|
|            | Exudate<br>availability         | Biomass<br>requirement |                             |
| Gly        | 0.002                           | 8.08                   | 4954.24                     |
| Trp        | 0.005                           | 0.47                   | 98.94                       |
| Ala        | 0.061                           | 4.03                   | 65.83                       |
| Met        | 0.009                           | 0.56                   | 62.91                       |
| Val        | 0.030                           | 1.53                   | 50.49                       |
| Pro        | 0.030                           | 1.39                   | 46.55                       |
| Asp        | 0.047                           | 2.02                   | 42.82                       |
| Gln        | 0.030                           | 1.08                   | 35.15                       |
| Asn        | 0.048                           | 1.47                   | 30.34                       |
| Ser        | 0.056                           | 0.04                   | 30.16                       |
| Lys        | 0.062                           | 1.68                   | 27.06                       |
| Ile/Leu    | 0.060                           | 1.58                   | 26.31                       |
| Glu        | 0.053                           | 1.38                   | 26.05                       |
| Phe        | 0.031                           | 0.75                   | 24.43                       |
| His        | 0.019                           | 0.36                   | 18.56                       |
| Thr        | 0.213                           | 1.89                   | 8.87                        |
| Arg        | 0.080                           | 0.71                   | 9.93                        |
| Tyr        | 0.062                           | 0.22                   | 3.50                        |

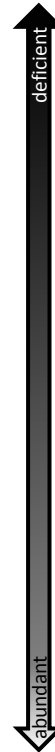

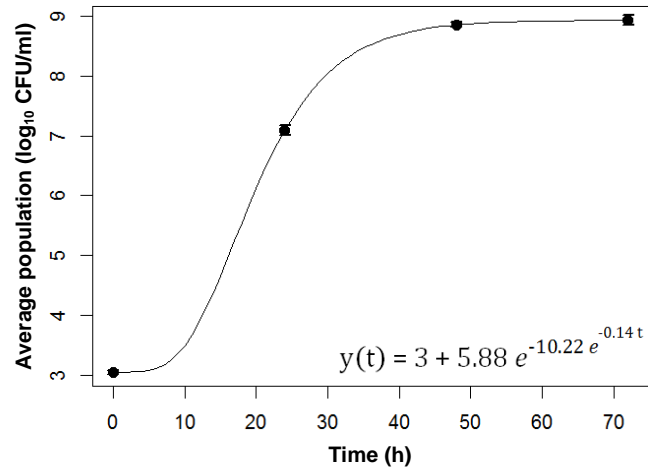

**Figure S1: Growth of *S. enterica* in alfalfa exudates over time.** Data shown are the WT population averages at each time point from a representative experiment (n=3). Error bars indicate the standard deviations of the means.
